# Supplementary material
Source: MDPI journal article supplement (https://www.mdpi.com/2076-3263/13/7/194)
Supplement: s1 [file s1]

Archive with 2 entries (2 files):
- S1 - Supplementary material - Bibliography.pdf
- S2 - Supplementary Material Topographic and Geophysics Instruments.pdf
